# Supplementary material for: Ethylene Promotes Expression of the Appressorium- and Pathogenicity-Related Genes via GPCR- and MAPK-Dependent Manners in Colletotrichum gloeosporioides
Source: MDPI journal article supplement (doi:10.3390/jof8060570), 2022-05-26
Supplement: s1 [file s1]

## Supporting Information

**Supplemental Figure S1.** Statistics of red fluorescence area in FDA-PI dual fluorescence staining.

Dual-fluorescence staining with FDA targeting living cells (bright green) and PI targeting dead cells (red fluorescence), ethylene can significantly promote the red fluorescence area in FDA-PI dual fluorescence staining at 24hpi.

**Supplemental Figure S2.** qRT-PCR verification of up-regulated differential genes.

Bar graph showing the results of qRT-PCR validation of the ET-regulated genes; Visualization of RNA-Seq reads coverage across the *C. gloeosporioides* gene analyzed by IGV software, the orange curves indicate read coverage (log scale), for the six samples, the blue line indicated the gene annotation region, the red lines indicate regions amplified by qRT-PCR primers. Information on ET-inducible genes is provided in Supplementary Table3.

**Supplemental Figure S3.** qRT-PCR verification of the up-regulated differential

genes. Bar graph showing the results of qRT-PCR validation of ET-inducible genes; Visualization of RNA-Seq coverage across the *C. gloeosporioides* gene by IGV software, the orange curves indicate read coverage (log scale) samples, the blue line indicated the gene annotation region, the red lines indicate regions amplified by qRT-PCR primers. Information on ET-inducible genes is provided in Supplementary Table3.

**Supplemental Figure S4.** Annotation information of genes enriched in extracellular region (GO: 0005576).

(a), ET treatment can significantly promote the expression of the genes encoding for polysaccharide deacetylase, cutinase, multicopper oxidase, cerato-platanin protein and other extracellular hydrolases; (b), ET treatment can significantly promote transcript levels of the genes encoding for cell wall proteins, appressorial structure proteins, glycolipid anchored surface protein, and other extracellular structure components.

**Supplemental Table S1.** Oligonucleotide primers used for target amplification in this study.

**Supplemental Table S2.** Principal components analysis.

**Supplemental Table S3.** Correlation analysis of QPCR and RNAseq.

**Supplemental Table S4.** GO terms of fungal transcripts that are significantly differentially expressed by ethylene treatment. GOID, GO terms, Class, Pvalue and GeneCount are show.

**Supplemental Table S5.** *Colletotrichum gloeosporioides* gene expression profile during ethylene treatment 4hpi. GeneID, log2FC(ET/CK), Pvalue, FPKM\_ET, FPKM\_CK, Description and NR\_name are show.

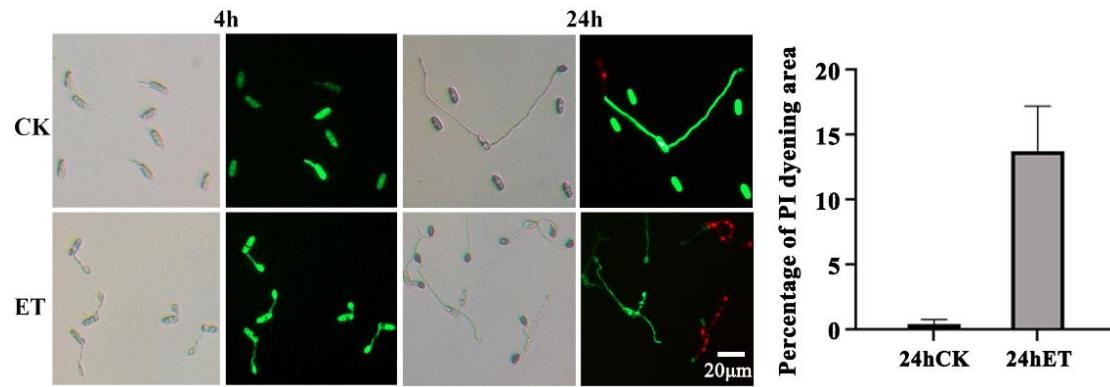

**Supplemental Figure S1.** Statistics of red fluorescence area in FDA-PI dual fluorescence staining. Dual-fluorescence staining with FDA targeting living cells (bright green) and PI targeting dead cells (red fluorescence), ethylene can significantly promote the red fluorescence area in FDA-PI dual fluorescence staining at 24hpi.

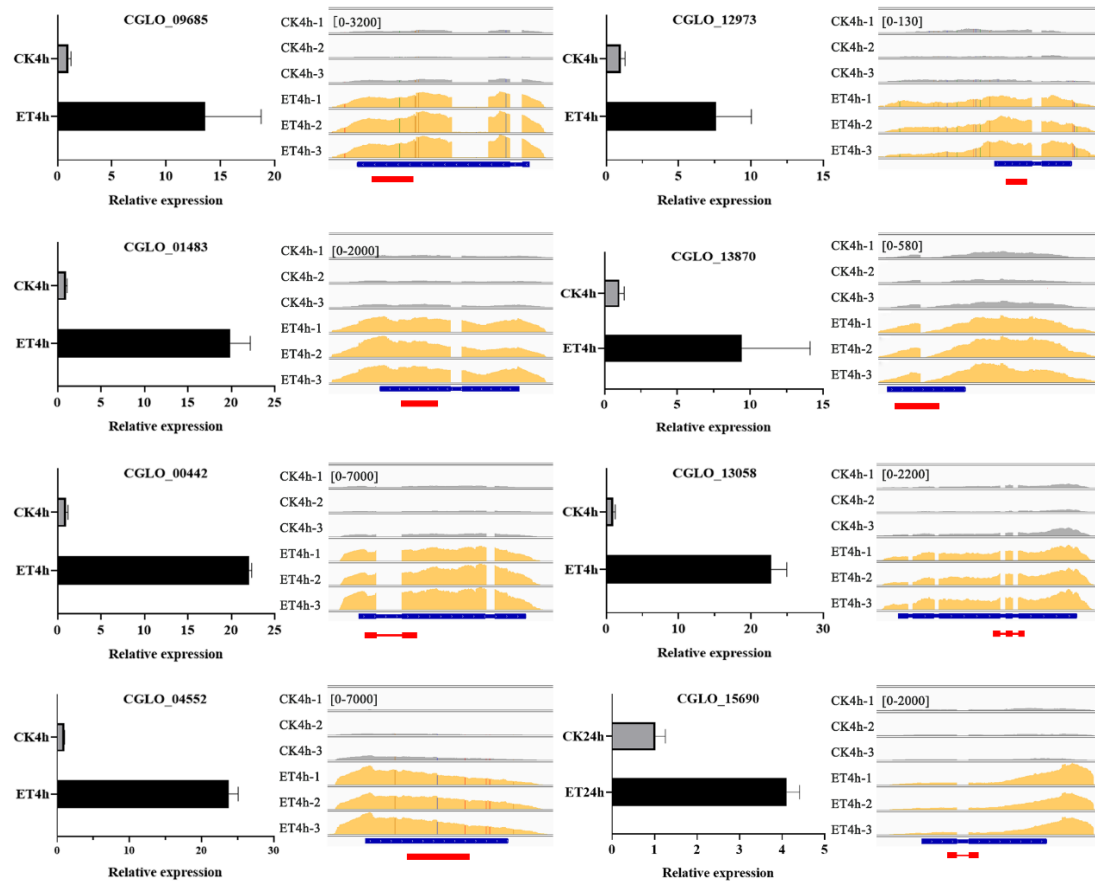

**Supplemental Figure S2.** qRT-PCR verification of up-regulated differential genes. Bar graph showing the results of qRT-PCR validation of the ET-regulated genes; Visualization of RNA-Seq reads coverage across the *C. gloeosporioides* gene analyzed by IGV software, the orange curves indicate read coverage (log scale), for the six samples, the blue line indicated the gene annotation region, the red lines indicate regions amplified by qRT-PCR primers. Information on ET-inducible genes is provided in Supplementary Table3.

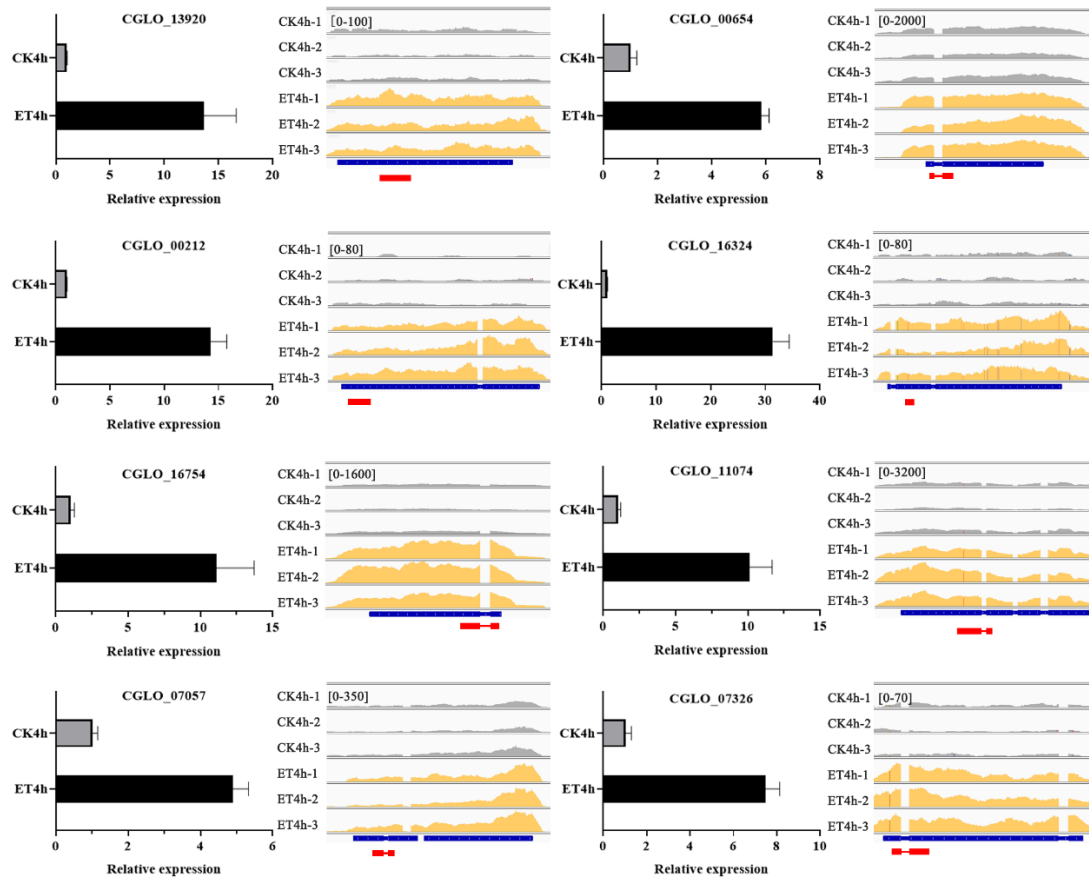

**Supplemental Figure S3.** qRT-PCR verification of the up-regulated differential genes. Bar graph showing the results of qRT-PCR validation of ET-inducible genes; Visualization of RNA-Seq coverage across the *C. gloeosporioides* gene by IGV software, the orange curves indicate read coverage (log scale) samples, the blue line indicated the gene annotation region, the red lines indicate regions amplified by qRT-PCR primers. Information on ET-inducible genes is provided in Supplementary Table3.

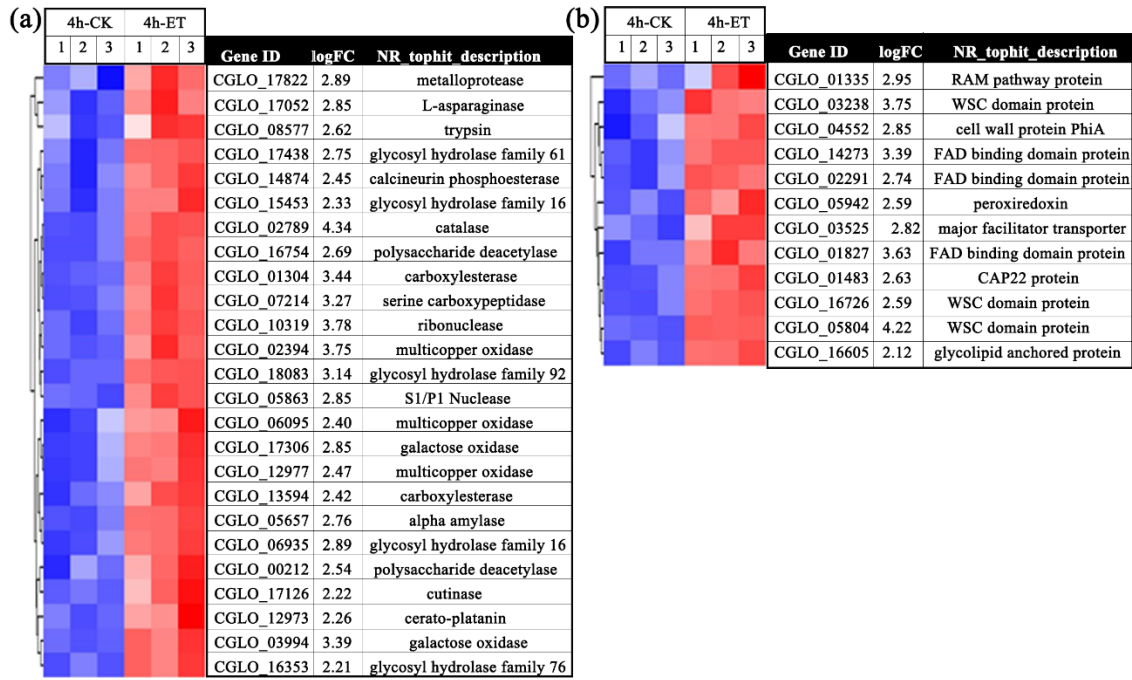

**Supplemental Figure S4.** Annotation information of genes enriched in extracellular region (GO: 0005576). (a), ET treatment can significantly promote the expression of the genes encoding for polysaccharide deacetylase, cutinase, multicopper oxidase, cerato-platanin protein and other extracellular hydrolases; (b), ET treatment can significantly promote transcript levels of the genes encoding for cell wall proteins, appressorial structure proteins, glycolipid anchored surface protein, and other extracellular structure components.

**Supplemental Table S1 Oligonucleotide primers used for target amplification in this study**

| <b>Primer</b>                                          | <b>Nucleotide sequence (5'-3')</b> | <b>Target of amplification</b>                                                      |
|--------------------------------------------------------|------------------------------------|-------------------------------------------------------------------------------------|
| <b>Gene expression level detection related primers</b> |                                    |                                                                                     |
| actin-QF                                               | GGTCTTTCGAAGAGAAGCCCAG             | Primers used for amplification of the actin gene in quantitative real-time PCR      |
| actin-QR                                               | GAGGAAGATGTAGTCGAGCAGGTG           |                                                                                     |
| CGLO_00442-QF                                          | CCTCCGAGTCTAAGGGTTCCAAG            | Primers used for amplification of the CGLO_00442 gene in quantitative real-time PCR |
| CGLO_00442-QR                                          | GTTGGCGTAGTTGACGATGACC             |                                                                                     |
| CGLO_04552-QF                                          | CCAAGTCCTCCATCTTCCTCCAG            | Primers used for amplification of the CGLO_04552 gene in quantitative real-time PCR |
| CGLO_04552-QR                                          | CGTAGGCGTCGATGGTCCAG               |                                                                                     |
| CGLO_13870-QF                                          | GAGGAGCTTGCAGCCCTCGAG              | Primers used for amplification of the CGLO_13870 gene in quantitative real-time PCR |
| CGLO_13870-QR                                          | CGGGTGATGAAGTTACGGATCTCG           |                                                                                     |
| CGLO_11074-QF                                          | CACTGGACTCAACCTGGCTGAAG            | Primers used for amplification of the CGLO_11074 gene in quantitative real-time PCR |
| CGLO_11074-QR                                          | CCATCACATCCAAGATCGAGATGGC          |                                                                                     |
| CGLO_12973-QF                                          | TCTCCGTCTCCTTCGACACCGG             | Primers used for amplification of the CGLO_12973 gene in quantitative real-time PCR |
| CGLO_12973-QR                                          | GGAGTTCCAGCCGGCAATGg               |                                                                                     |
| CGLO_09685-QF                                          | GCTGGCAACATCACCTTCGATG             | Primers used for amplification of the CGLO_09685 gene in quantitative real-time PCR |
| CGLO_09685-QR                                          | GCTGGCAACATCACCTTCGATG             |                                                                                     |
| CGLO_01483-QF                                          | CCTTGGCAACATCTGCACTGTC             | Primers used for amplification of the CGLO_01483 gene in quantitative real-time PCR |
| CGLO_01483-QR                                          | GATGGAGTTGATACCCTCAAGGC            |                                                                                     |
| CGLO_08208-QF                                          | CGTCGCGACCGAACTATTCAACC            | Primers used for amplification of the CGLO_08208 gene in quantitative real-time PCR |
| CGLO_08208-QR                                          | CAACGGTCGCTTCGATGATCCAATC          |                                                                                     |

|               |                         |                                                                                     |
|---------------|-------------------------|-------------------------------------------------------------------------------------|
| CGLO_08904-QF | CCTACCGTTCGCAAGCTAGCG   | Primers used for amplification of the CGLO_08904 gene in quantitative real-time PCR |
| CGLO_08904-QR | CGGTCCTTGGCTGACAGGTTC   |                                                                                     |
| CGLO_13920-QF | CACCTCGCAAGATCCACCACC   | Primers used for amplification of the CGLO_13920 gene in quantitative real-time PCR |
| CGLO_13920-QR | GGCACCATAGTTGACGGTGGTC  |                                                                                     |
| CGLO_00212-QF | GACTGTTGCTGCCACTCTCC    | Primers used for amplification of the CGLO_00212 gene in quantitative real-time PCR |
| CGLO_00212-QR | GCCAGGACGAGAAGGAAGTCC   |                                                                                     |
| CGLO_16754-QF | CACTTCCTCTCTCCTGAGCGC   | Primers used for amplification of the CGLO_16754 gene in quantitative real-time PCR |
| CGLO_16754-QR | CTGCTTCAGGATGTCGAGAAGC  |                                                                                     |
| CGLO_07057-QF | CGACCTTATCCATTCAGCTGGC  | Primers used for amplification of the CGLO_07057 gene in quantitative real-time PCR |
| CGLO_07057-QR | CGTCGTCATCTTGATAGGTCG   |                                                                                     |
| CGLO_00654-QF | CTCCAAGATCCTTACCGTGGC   | Primers used for amplification of the CGLO_00654 gene in quantitative real-time PCR |
| CGLO_00654-QR | CCTCGAACTTCACAGAGGTGC   |                                                                                     |
| CGLO_11074-QF | CTGTGCACGATGACAAGGAGC   | Primers used for amplification of the CGLO_11074 gene in quantitative real-time PCR |
| CGLO_11074-QR | CAGATTGGCCAAGAGGACGATG  |                                                                                     |
| CGLO_07326-QF | CTGTGAATGACGAGAACGACCC  | Primers used for amplification of the CGLO_07326 gene in quantitative real-time PCR |
| CGLO_07326-QR | CTTCGCCTCACGTTGTGCTG    |                                                                                     |
| CGLO_03844-QF | CATCCAGGGTGCTCTTACCAACG | Primers used for amplification of the CGLO_03844 gene in quantitative real-time PCR |
| CGLO_03844-QR | GGCTTCTTGTTGGTCAGGTCGG  |                                                                                     |
| CGLO_15589-QF | GACGCTGGCTCAAGATGAAAGC  | Primers used for amplification of the CGLO_15589 gene in quantitative real-time PCR |
| CGLO_15589-QR | GAGGTTCACTGGTGGATTTC    |                                                                                     |
| CGLO_13252-QF | GCAGCTGACCAAGACCCTCATC  |                                                                                     |



|               |                         |                                                                                     |
|---------------|-------------------------|-------------------------------------------------------------------------------------|
| CGLO_13252-QR | GGATGTCGGTCTGAGCCTTTGTC | Primers used for amplification of the CGLO_13252 gene in quantitative real-time PCR |
| CGLO_11351-QF | GCTCACAGTACACGCTTCCC    | Primers used for amplification of the CGLO_11351 gene in quantitative real-time PCR |
| CGLO_11351-QR | CCACCGTGGAAGTTGAGTGC    |                                                                                     |
| CGLO_03249-QF | CGTTGTCAGCGTCGCTGTC     | Primers used for amplification of the CGLO_03249 gene in quantitative real-time PCR |
| CGLO_03249-QR | GCATCGATCTTCTGGAAAGCGC  |                                                                                     |
| CGLO_07611-QF | GCACCAATTCGATCGATCGC    | Primers used for amplification of the CGLO_07611 gene in quantitative real-time PCR |
| CGLO_07611-QR | GACATGGAAATCTGTCACGTTG  |                                                                                     |
| CGLO_01303-QF | CGATCACTTGCTCATTGGCTC   | Primers used for amplification of the CGLO_01303 gene in quantitative real-time PCR |
| CGLO_01303-QR | GGACGATTTGCTCGTTGTGC    |                                                                                     |
| CGLO_02789-QF | CTCCTGCTCCAGGACTTCCAC   | Primers used for amplification of the CGLO_02789 gene in quantitative real-time PCR |
| CGLO_02789-QR | GGTCTTCTTGCCGACCTGGTTG  |                                                                                     |
| CGLO_10460-QF | CATCTCCGCGCTCTATCAGTC   | Primers used for amplification of the CGLO_10460 gene in quantitative real-time PCR |
| CGLO_10460-QR | GAACTCGACCAGATCCGTCC    |                                                                                     |
| CGLO_07307-QF | CTCACAAGTCGACCTACACCG   | Primers used for amplification of the CGLO_07307 gene in quantitative real-time PCR |
| CGLO_07307-QR | GCAATTCTGCTGGTCGTAGACG  |                                                                                     |
| CGLO_05804-QF | GGCCTTATGGCCATGCCTTTG   | Primers used for amplification of the CGLO_05804 gene in quantitative real-time PCR |
| CGLO_05804-QR | CATCTGGGTGCTCATCGAGTC   |                                                                                     |

**Deletion and identification related primers of cgcap22 mutants**

|    |                                                |                                                                             |
|----|------------------------------------------------|-----------------------------------------------------------------------------|
| P1 | TTAAGAAGGAGCCCTTACCGTGAAACTCGACAGCGGCTTAC      | Primers to amplify upstream fragment for generating cgcap22 deletion mutant |
| P2 | gcccgaatcggaatcgcgctctagTTTGAAGGTTGGGGGGTTGTTG |                                                                             |
| P3 | GGGTCGGCGCGCCCAACCCTTGCTGGCATTGTTTCGTCCCAG     |                                                                             |

|     |                                                  |                                                                                      |
|-----|--------------------------------------------------|--------------------------------------------------------------------------------------|
| P4  | tgattactaacagatatcaagcttACGCCTTGCCTGGCTGGGTCTTTG | Primers to amplify downstream fragment for<br>generating cgcap22 deletion mutant     |
| P5  | CAACAACCCCCCAACCTTCAAActagagccgattcccattcgggc    | Primers to amplify NAT resistance fragment for<br>generating cgcap22 deletion mutant |
| P6  | CAAAGACCCAGCCAGGCAAGGCGTaagcttgatatctgtagtaatca  |                                                                                      |
| P7  | ATGCAGGCCAAGATCGTCGCC                            | Primers to identify cgcap22 deletion mutant                                          |
| P8  | TTAGAGCATGAAGGCGCCAAGG                           |                                                                                      |
| P9  | GTGAGTAATTGAGCCACACTG                            |                                                                                      |
| P10 | CGGTCATCATGACGTCCAAG                             |                                                                                      |

#### **Deletion and identification related primers of cgcp1 mutants**

|     |                                                |                                                                                    |
|-----|------------------------------------------------|------------------------------------------------------------------------------------|
| P11 | TTAAGAAGGAGCCCTTCACCCGCCTCATCCTTTCGAGAGTCG     | Primers to amplify upstream fragment for<br>generating cgcp1 deletion mutant       |
| P12 | gcccgaatcgggaatcgggctctagTTTGGCTGTTGTGGTGGGTGG | Primers to amplify downstream fragment for<br>generating cgcp1 deletion mutant     |
| P13 | GGGTCGGCGCGCCCACCCTTGACGACGATTCCCTCTTCAACT     |                                                                                    |
| P14 | tgattactaacagatatcaagcttATCACCACACGACCTGGGCG   | Primers to amplify NAT resistance fragment for<br>generating cgcp1 deletion mutant |
| P15 | CCACCCACCACAACAGCCAAActagagccgattcccattcgggc   |                                                                                    |
| P16 | CGCCCAGGTCGTGTGGTGATaagcttgatatctgtagtaatca    | Primers to identify cgcp1 deletion mutant                                          |
| P17 | ATGCAGTTCTCCAACCTCGTC                          |                                                                                    |
| P18 | TTACAGACCGCAGGCGCTGAG                          |                                                                                    |
| P19 | GTAACGTTGCTCGGCTGGATTG                         |                                                                                    |
| P20 | CCTAACCAGACACAGGAACC                           |                                                                                    |

#### **Deletion and identification related primers of cgmk1 mutants**

|     |                                                |                                                                              |
|-----|------------------------------------------------|------------------------------------------------------------------------------|
| P21 | TTAAGAAGGAGCCCTTCACCGCGTTGGACCGGACCTCCTTCG     | Primers to amplify upstream fragment for<br>generating cgmk1 deletion mutant |
| P22 | gcccgaatcgggaatcgggctctagCTTTGGGGTATTTCGAGGTTG |                                                                              |

|     |                                                |                                                                                 |
|-----|------------------------------------------------|---------------------------------------------------------------------------------|
| P23 | GGGTCGGCGCGCCACCCCTTGACCAGAGCATAAGGTGGACGAA    | Primers to amplify downstream fragment for generating cgmk1 deletion mutant     |
| P24 | tgattactaacagatatcaagcttTTCGTCCACCTTATGCTCTGGT |                                                                                 |
| P25 | CATCGTCCTATACCAGCGACCctagagccgattcccgattcgggc  | Primers to amplify NAT resistance fragment for generating cgmk1 deletion mutant |
| P26 | TTCGTCCACCTTATGCTCTGGTgaagcttgatatctgtagtaatca |                                                                                 |
| P27 | ATGTCGCGCGCGAATCCCCC                           | Primers to identify cgmk1 deletion mutant                                       |
| P28 | TTCGTCCACCTTATGCTCTGGT                         |                                                                                 |
| P29 | CAACTTCAGACTTGCTGGCC                           |                                                                                 |
| P30 | TTCGTCCACCTTATGCTCTGGT                         |                                                                                 |

#### **Deletion and identification related primers of cgst11 mutants**

|     |                                                |                                                                                  |
|-----|------------------------------------------------|----------------------------------------------------------------------------------|
| P31 | TTAAGAAGGAGCCCTTCACCGCGCTGAGTAATTCCTCAGGTAC    | Primers to amplify upstream fragment for generating cgst11 deletion mutant       |
| P32 | gcccgaatcggaatcggtcttagCTTTGGGGTATTTTCGAGGTTG  |                                                                                  |
| P33 | GGGTCGGCGCGCCACCCCTTGAACGTGGCCACGCAGACGATAC    | Primers to amplify downstream fragment for generating cgst11 deletion mutant     |
| P34 | tgattactaacagatatcaagcttCCACTCGCCGAGCGCAGATCTG |                                                                                  |
| P35 | CAACCTCGAAATACCCCAAAGctagagccgattcccgattcgggc  | Primers to amplify NAT resistance fragment for generating cgst11 deletion mutant |
| P36 | GTATCGTCTGCGTGGCCACGTTaagcttgatatctgtagtaatca  |                                                                                  |
| P37 | ATGGCAATGCTAGCCCCCAAG                          | Primers to identify cgst11 deletion mutant                                       |
| P38 | TTATGTGATGGGCGTAAGGAAG                         |                                                                                  |
| P39 | GGTCGTAGGTAGACAATGCG                           |                                                                                  |
| P40 | GATCGATCCATGACTGTTCTC                          |                                                                                  |

#### **Deletion and identification related primers of cggper3-1 mutants**

|     |                                            |
|-----|--------------------------------------------|
| P41 | TTAAGAAGGAGCCCTTCACCGCATGGGATCTGCAGATGCAAC |
|-----|--------------------------------------------|

|     |                                                   |                                                                                     |
|-----|---------------------------------------------------|-------------------------------------------------------------------------------------|
| P42 | gcccgaatcgggaatcgggctctagACTCGTTGGTCGGCTTCAATATGG | Primers to amplify upstream fragment for generating cggpcr3-1 deletion mutant       |
| P43 | GGGTCGGCGCGCCACCCTTGTGTGAGTCACCTTGTGGTTC          | Primers to amplify downstream fragment for generating cggpcr3-1 deletion mutant     |
| P44 | tgattactaacagatatcaagcttCTCGGCTGTTGGTGTATATTG     |                                                                                     |
| P45 | CCATATTGAAGCCGACCAACGAGTctagagccgcattcccattcgggc  | Primers to amplify NAT resistance fragment for generating cggpcr3-1 deletion mutant |
| P46 | CAATATACACCAACAGCCGAGaagcttgatatctgttagtaatca     |                                                                                     |
| P47 | ATGGGAGACAGCCACGGCGC                              | Primers to identify cggpcr3-1 deletion mutant                                       |
| P48 | TCATACTAAACGATCCCCAC                              |                                                                                     |
| P49 | CGTCTGTTGCTCTCTTTTCG                              |                                                                                     |
| P50 | GACAGCTACCGAGGACAGAG                              |                                                                                     |

#### **Deletion and identification related primers of cggpcr3-2 mutants**

|     |                                                     |                                                                                     |
|-----|-----------------------------------------------------|-------------------------------------------------------------------------------------|
| P51 | TTAAGAAGGAGCCCTTCACCCATGCGACAGTCCAGGCTTG            | Primers to amplify upstream fragment for generating cggpcr3-2 deletion mutant       |
| P52 | gcccgaatcgggaatcgggctctagCTCGCTGTTCAAAGTGTGTAGATGTG | Primers to amplify downstream fragment for generating cggpcr3-2 deletion mutant     |
| P53 | GGGTCGGCGCGCCACCCTTATGAGACGGTGCACAAACCAC            |                                                                                     |
| P54 | tgattactaacagatatcaagcttGATATGCCATTGAAAGGATGAGCGT   | Primers to amplify NAT resistance fragment for generating cggpcr3-2 deletion mutant |
| P55 | CACATCTACACACTTTGAACAGCGAGctagagccgcattcccattcgggc  |                                                                                     |
| P56 | ACGCTCATCCTTTCAATGGCATATCaagcttgatatctgttagtaatca   | Primers to identify cggpcr3-2 deletion mutant                                       |
| P57 | ATGGATCAACCAGAAGAGAAAGTC                            |                                                                                     |
| P58 | TCATGACCGCGAGGCCTGGTC                               |                                                                                     |
| P59 | GGCGTTGGCGATGAATTCACAG                              |                                                                                     |

#### **Deletion and identification related primers of cggpcr3-1/2 mutants**

|                                                               |                                              |                                                                                        |
|---------------------------------------------------------------|----------------------------------------------|----------------------------------------------------------------------------------------|
| P60                                                           | CCACAGCTGCAGTCTAGAGCCTCGCTGTTCAAAGTGTGTAG    | Primers to amplify upstream fragment for<br>generating cggpcr3-2 deletion mutant       |
| P61                                                           | CTACACACTTTGAACAGCGAGGCTCTAGACTGCAGCTGTGG    | Primers to amplify HYG resistance fragment for<br>generating cggpcr3-2 deletion mutant |
| P62                                                           | CATCCTTTCAATGGCATATCCGGGATCCGCTTAGACAA       |                                                                                        |
| P63                                                           | TTGTCTAAGCGGATCCCGGATATGCCATTGAAAGGATG       | Primers to amplify downstream fragment for<br>generating cggpcr3-2 deletion mutant     |
| <b>Fluorescent strain mutant construction related primers</b> |                                              |                                                                                        |
| P64                                                           | cgagggccagtgaattcgagctGAGGCAGATTTTTGTGGTCGG  | Cg-gfp fluorescent strain related primers                                              |
| P65                                                           | ccggggccttggtaccgagctCATGATTACGAATTCGCCAGCAG |                                                                                        |
| P66                                                           | ccggggccttggtaccgagctGAGGCAGATTTTTGTGGTCGG   |                                                                                        |
| P67                                                           | gacggccagtgaattcgagctGACTTGACATTTGACACGGC    | PCGLO_03844-gfp fluorescent strain related<br>primers                                  |
| P68                                                           | GAACTTGTTGGACAGGGCCATTGTGATTTGTGTGTTGTGTTG   |                                                                                        |
| P69                                                           | CAACACAACACACAAATCACAATGGCCCTGTCCAACAAGTTC   |                                                                                        |
| P70                                                           | gacggccagtgaattcgagctCGACCAAGACAAATAGGCTCC   | PCGLO_13252-gfp fluorescent strain related<br>primers                                  |
| P71                                                           | GAACTTGTTGGACAGGGCCATTTTGATTCACTATCCAGAGTGAT |                                                                                        |
| P72                                                           | ATCACTCTGGATAGTGAATCAAAATGGCCCTGTCCAACAAGTTC |                                                                                        |

---

**Supplemental Table S2 Principal components analysis**

|                | <b>PC1</b> | <b>PC2</b> | <b>PC3</b> | <b>PC4</b> | <b>PC5</b> | <b>PC6</b> | <b>PC7</b> | <b>PC8</b> | <b>PC9</b> | <b>PC10</b> | <b>PC11</b> | <b>PC12</b> |
|----------------|------------|------------|------------|------------|------------|------------|------------|------------|------------|-------------|-------------|-------------|
| <b>4hET.1</b>  | 0.26366    | 0.08453    | -0.05447   | -0.64277   | 0.05518    | 0.34045    | 0.34522    | 0.24225    | -0.06597   | 0.01736     | -0.43553    | 0.12676     |
| <b>4hET.2</b>  | 0.22780    | 0.15877    | 0.31960    | -0.19318   | 0.47952    | -0.39280   | 0.00767    | 0.20060    | -0.48914   | -0.04058    | 0.33168     | -0.08940    |
| <b>4hET.3</b>  | 0.15149    | 0.26194    | 0.18523    | -0.28172   | 0.38369    | 0.16602    | -0.41499   | -0.45349   | 0.47216    | 0.12266     | 0.05710     | -0.02964    |
| <b>4hCK.1</b>  | 0.04860    | 0.52403    | 0.06614    | 0.13755    | -0.20185   | -0.12392   | 0.47899    | -0.51463   | -0.19304   | 0.32567     | -0.07388    | -0.02385    |
| <b>4hCK.2</b>  | 0.07077    | 0.47938    | 0.01889    | 0.00949    | -0.32555   | -0.05694   | -0.21285   | 0.59215    | 0.24595    | 0.41385     | 0.15924     | -0.04949    |
| <b>4hCK.3</b>  | 0.04214    | 0.53271    | 0.03408    | 0.07704    | -0.19679   | 0.08543    | -0.18346   | 0.00500    | -0.08544   | -0.77926    | -0.08603    | 0.07543     |
| <b>24hET.1</b> | 0.45230    | -0.15683   | 0.14622    | 0.01935    | -0.14752   | -0.05190   | 0.47199    | 0.01184    | 0.47446    | -0.24940    | 0.45729     | 0.07260     |
| <b>24hET.2</b> | 0.46395    | -0.16348   | 0.43557    | 0.33906    | -0.06852   | -0.17032   | -0.20528   | 0.02416    | -0.01379   | 0.10309     | -0.48554    | 0.36105     |
| <b>24hET.3</b> | 0.46946    | -0.19648   | -0.08358   | -0.16104   | -0.45340   | 0.21625    | -0.31821   | -0.21226   | -0.35898   | 0.06588     | 0.18245     | -0.37808    |
| <b>24hCK.1</b> | 0.24620    | 0.11191    | -0.40807   | 0.31089    | 0.26733    | 0.42233    | -0.03842   | 0.02169    | -0.21169   | 0.13094     | 0.29511     | 0.51270     |
| <b>24hCK.2</b> | 0.27520    | 0.08708    | -0.16318   | 0.42981    | 0.36117    | 0.15985    | 0.14281    | 0.15931    | 0.11519    | -0.04246    | -0.26523    | -0.64663    |
| <b>24hCK.3</b> | 0.26444    | 0.02844    | -0.66592   | -0.15023   | 0.02037    | -0.62766   | -0.10999   | -0.09102   | 0.12711    | -0.04801    | -0.15246    | 0.08240     |

**Supplemental Table S3 Correlation analysis of QPCR and RNAseq**

| <b>ID</b>  | <b>fold change</b> | <b>Log2 fold change(qPCR)</b> | <b>Log2 fold change(RNA-seq)</b> | <b>Description</b>                    |
|------------|--------------------|-------------------------------|----------------------------------|---------------------------------------|
| CGLO_00442 | 22.0353            | 4.461744633                   | 2.877                            | THR1                                  |
| CGLO_04552 | 23.797115          | 4.572714777                   | 2.849                            | Cell wall protein phiA                |
| CGLO_13870 | 9.395725           | 3.232004488                   | 1.438                            | polyketide synthase                   |
| CGLO_11074 | 10.062866          | 3.330969352                   | 1.76                             | Manganese transporter SMF1            |
| CGLO_12973 | 7.6074728          | 2.92741727                    | 2.2605                           | cerato-platanin                       |
| CGLO_09685 | 13.595699          | 3.765078422                   | 2.881                            | SCD1                                  |
| CGLO_01483 | 19.858043          | 4.311651548                   | 2.626                            | CAP22 protein                         |
| CGLO_08208 | 0.1740302          | -2.522590412                  | -1.965                           | FAD binding domain-containing protein |
| CGLO_08904 | 0.4268419          | -1.228226293                  | -1.495                           | hypothetical protein                  |
| CGLO_13920 | 13.64735141        | 3.770549084                   | 1.801                            | WD repeat-containing protein          |
| CGLO_00212 | 14.27042576        | 3.834956474                   | 2.544                            | polysaccharide deacetylase            |
| CGLO_16754 | 11.09566601        | 3.471924362                   | 2.69                             | polysaccharide deacetylase            |
| CGLO_07057 | 4.898853127        | 2.292444039                   | 1.272                            | polysaccharide deacetylase            |
| CGLO_00654 | 5.830917258        | 2.543722851                   | 1.061                            | hypothetical protein                  |
| CGLO_07326 | 7.483266722        | 2.903668197                   | 2.38                             | hypothetical protein                  |
| CGLO_03844 | 42.15431418        | 5.397608383                   | 4.449                            | cell wall protein                     |
| CGLO_15589 | 56.09184781        | 5.809719205                   | 5.067                            | DJ-1/PfpI family protein              |
| CGLO_13252 | 47.49807406        | 5.569797112                   | 4.176                            | hypothetical protein                  |
| CGLO_11351 | 32.18476736        | 5.008306136                   | 4.759                            | Superoxide dismutase                  |

|            |             |             |       |                                 |
|------------|-------------|-------------|-------|---------------------------------|
| CGLO_03249 | 50.8814551  | 5.669068024 | 4.603 | hypothetical protein            |
| CGLO_07611 | 35.18392275 | 5.136844436 | 4.6   | hypothetical protein            |
| CGLO_01303 | 23.31791181 | 4.543366692 | 4.139 | hypothetical protein            |
| CGLO_02789 | 39.11849297 | 5.289778887 | 4.339 | catalase                        |
| CGLO_10460 | 29.56653044 | 4.885893052 | 4.087 | hypothetical protein            |
| CGLO_07307 | 52.26538594 | 5.707783897 | 4.364 | kelch domain-containing protein |
| CGLO_05804 | 26.19961059 | 4.711473464 | 4.219 | WSC domain-containing protein   |

---



**Supplemental Table S4 GO terms of fungal transcripts that are significantly differentially expressed by ethylene treatment. GOID, GO terms, Class, Pvalue and GeneCount are show**

| GOID                                                                                                  | GO terms                                                                                | Class              | Pvalue      | GeneCount |
|-------------------------------------------------------------------------------------------------------|-----------------------------------------------------------------------------------------|--------------------|-------------|-----------|
| <b>GO terms of fungal transcripts that are significantly up-regulated by ethylene treatment 4 hpi</b> |                                                                                         |                    |             |           |
| GO:0031225                                                                                            | anchored component of membrane                                                          | cellular_component | 1.81E-06    | 22        |
| GO:0016209                                                                                            | antioxidant activity                                                                    | molecular_function | 2.89E-06    | 16        |
| GO:0004601                                                                                            | peroxidase activity                                                                     | molecular_function | 3.13E-06    | 14        |
| GO:0005576                                                                                            | extracellular region                                                                    | cellular_component | 4.47E-06    | 143       |
| GO:0016684                                                                                            | oxidoreductase activity, acting on peroxide as acceptor                                 | molecular_function | 5.67E-06    | 14        |
| GO:0019863                                                                                            | IgE binding                                                                             | molecular_function | 4.76E-05    | 7         |
| GO:0019865                                                                                            | immunoglobulin binding                                                                  | molecular_function | 4.76E-05    | 7         |
| GO:0009986                                                                                            | cell surface                                                                            | cellular_component | 4.79E-05    | 33        |
| GO:0031226                                                                                            | intrinsic component of plasma membrane                                                  | cellular_component | 0.000111816 | 63        |
| GO:0009277                                                                                            | fungus-type cell wall                                                                   | cellular_component | 0.000147678 | 17        |
| GO:0005199                                                                                            | structural constituent of cell wall                                                     | molecular_function | 0.000148177 | 3         |
| GO:0042438                                                                                            | melanin biosynthetic process                                                            | biological_process | 0.000167855 | 10        |
| GO:0017171                                                                                            | serine hydrolase activity                                                               | molecular_function | 0.000183369 | 19        |
| GO:0008236                                                                                            | serine-type peptidase activity                                                          | molecular_function | 0.000184435 | 16        |
| GO:0005618                                                                                            | cell wall                                                                               | cellular_component | 0.000331261 | 43        |
| GO:0016811                                                                                            | hydrolase activity, acting on carbon-nitrogen (but not peptide) bonds, in linear amides | molecular_function | 0.000421455 | 16        |

|                                                                                                         |                                                                       |                    |             |     |
|---------------------------------------------------------------------------------------------------------|-----------------------------------------------------------------------|--------------------|-------------|-----|
| GO:0016810                                                                                              | hydrolase activity, acting on carbon-nitrogen (but not peptide) bonds | molecular_function | 0.000509917 | 23  |
| GO:0030158                                                                                              | protein xylosyltransferase activity                                   | molecular_function | 0.000569293 | 3   |
| GO:0035252                                                                                              | UDP-xylosyltransferase activity                                       | molecular_function | 0.000569293 | 3   |
| GO:0016722                                                                                              | oxidoreductase activity, oxidizing metal ions                         | molecular_function | 0.000579583 | 8   |
| <b>GO terms of fungal transcripts that are significantly down-regulated by ethylene treatment 4 hpi</b> |                                                                       |                    |             |     |
| GO:0006950                                                                                              | response to stress                                                    | biological_process | 1.34E-09    | 285 |
| GO:0009628                                                                                              | response to abiotic stimulus                                          | biological_process | 4.40E-09    | 177 |
| GO:0051716                                                                                              | cellular response to stimulus                                         | biological_process | 5.33E-09    | 314 |
| GO:0050896                                                                                              | response to stimulus                                                  | biological_process | 3.21E-08    | 416 |
| GO:0000731                                                                                              | DNA synthesis involved in DNA repair                                  | biological_process | 6.98E-08    | 24  |
| GO:0080134                                                                                              | regulation of response to stress                                      | biological_process | 9.29E-08    | 94  |
| GO:0033554                                                                                              | cellular response to stress                                           | biological_process | 2.39E-07    | 190 |
| GO:0048583                                                                                              | regulation of response to stimulus                                    | biological_process | 2.64E-07    | 151 |
| GO:0050794                                                                                              | regulation of cellular process                                        | biological_process | 3.02E-07    | 312 |
| GO:0006979                                                                                              | response to oxidative stress                                          | biological_process | 3.29E-07    | 89  |
| GO:0009411                                                                                              | response to UV                                                        | biological_process | 5.10E-07    | 34  |
| GO:0006281                                                                                              | DNA repair                                                            | biological_process | 8.40E-07    | 71  |
| GO:0035861                                                                                              | site of double-strand break                                           | cellular_component | 1.22E-06    | 21  |
| GO:0090734                                                                                              | site of DNA damage                                                    | cellular_component | 1.22E-06    | 21  |
| GO:0044454                                                                                              | nuclear chromosome part                                               | cellular_component | 1.59E-06    | 66  |

|                                                                                                                    |                                                                     |                    |          |     |
|--------------------------------------------------------------------------------------------------------------------|---------------------------------------------------------------------|--------------------|----------|-----|
| GO:0045003                                                                                                         | double-strand break repair via synthesis-dependent strand annealing | biological_process | 2.23E-06 | 11  |
| GO:0034599                                                                                                         | cellular response to oxidative stress                               | biological_process | 2.86E-06 | 57  |
| GO:0044764                                                                                                         | multi-organism cellular process                                     | biological_process | 3.42E-06 | 52  |
| GO:0010118                                                                                                         | stomatal movement                                                   | biological_process | 3.68E-06 | 19  |
| GO:0009314                                                                                                         | response to radiation                                               | biological_process | 3.91E-06 | 72  |
| <b>GO terms of fungal transcripts that are significantly differentially expressed by ethylene treatment 24 hpi</b> |                                                                     |                    |          |     |
| GO:0000003                                                                                                         | reproduction                                                        | biological_process | 0        | 454 |
| GO:0000910                                                                                                         | cytokinesis                                                         | biological_process | 0        | 104 |
| GO:0003006                                                                                                         | developmental process involved in reproduction                      | biological_process | 0        | 292 |
| GO:0005515                                                                                                         | protein binding                                                     | molecular_function | 0        | 675 |
| GO:0006139                                                                                                         | nucleobase-containing compound metabolic process                    | biological_process | 0        | 732 |
| GO:0006351                                                                                                         | transcription, DNA-templated                                        | biological_process | 0        | 376 |
| GO:0006355                                                                                                         | regulation of transcription, DNA-templated                          | biological_process | 0        | 341 |
| GO:0006464                                                                                                         | cellular protein modification process                               | biological_process | 0        | 406 |
| GO:0006793                                                                                                         | phosphorus metabolic process                                        | biological_process | 0        | 479 |
| GO:0006796                                                                                                         | phosphate-containing compound metabolic process                     | biological_process | 0        | 443 |
| GO:0006810                                                                                                         | transport                                                           | biological_process | 0        | 734 |
| GO:0006996                                                                                                         | organelle organization                                              | biological_process | 0        | 592 |
| GO:0007049                                                                                                         | cell cycle                                                          | biological_process | 0        | 382 |
| GO:0007154                                                                                                         | cell communication                                                  | biological_process | 0        | 527 |

|            |                                               |                    |   |     |
|------------|-----------------------------------------------|--------------------|---|-----|
| GO:0007163 | establishment or maintenance of cell polarity | biological_process | 0 | 98  |
| GO:0007165 | signal transduction                           | biological_process | 0 | 426 |
| GO:0007275 | multicellular organism development            | biological_process | 0 | 579 |
| GO:0008104 | protein localization                          | biological_process | 0 | 454 |
| GO:0009059 | macromolecule biosynthetic process            | biological_process | 0 | 628 |
| GO:0009889 | regulation of biosynthetic process            | biological_process | 0 | 487 |

---

**Supplemental Table S5 Colletotrichum gloeosporioides gene expression profile during ethylene treatment 4hpi. GeneID, log2FC(ET/CK), Pvalue, FPKM\_ET, FPKM\_CK, Description and NR\_name are show**

| GeneID                                                                             | log2FC(ETCK) | Pvalue      | FPKM_ET     | FPKM_CK     | Description   | NR_name        |
|------------------------------------------------------------------------------------|--------------|-------------|-------------|-------------|---------------|----------------|
| <b>ethylene promoted the Hydrophobic surface binding protein A gene expression</b> |              |             |             |             |               |                |
| CGLO_03844                                                                         | 4.449064211  | 5.42E-38    | 50.94638767 | 2.237024333 | HsbA          | XP_007274298.1 |
| CGLO_13252                                                                         | 4.176470575  | 3.21E-23    | 6.537920333 | 0.267104    | HsbA          | EQB47582.1     |
| CGLO_00547                                                                         | 4.178398372  | 8.26E-14    | 6.042790667 | 0.239267667 | HsbA          | EQB59113.1     |
| CGLO_15619                                                                         | -1.128859111 | 0.007472265 | 5.912797333 | 13.04913    | HsbA          | EQB45500.1     |
| CGLO_09362                                                                         | -0.029865411 | 0.282406067 | 2.485886    | 2.539974667 | HsbA          | EQB51140.1     |
| CGLO_08778                                                                         | -0.703009099 | 0.109797136 | 30.32419967 | 49.42745233 | HsbA          | EQB51658.1     |
| <b>ethylene promoted the cutinase gene expression</b>                              |              |             |             |             |               |                |
| CGLO_17337                                                                         | 1.217384692  | 2.19E-20    | 57.54139967 | 24.689354   | CTF1 $\alpha$ | EQB43948.1     |
| CGLO_17126                                                                         | 2.22324472   | 3.55E-13    | 4.813507667 | 0.952272667 | cutinase      | EQB44152.1     |
| CGLO_00958                                                                         | 1.338829748  | 2.42E-06    | 57.43496333 | 45.391884   | CTF1 $\beta$  | EQB58753.1     |
| CGLO_16577                                                                         | 1.282722721  | 0.000614238 | 1.611897    | 0.603622333 | cutinase      | EQB44664.1     |
| <b>ethylene promoted the melanin synthesis gene expression</b>                     |              |             |             |             |               |                |
| CGLO_05047                                                                         | 1.833153951  | 1.00E-22    | 103.0350573 | 28.84489567 | PKS           | EQB55056.1     |
| CGLO_09685                                                                         | 2.880763367  | 4.92E-38    | 234.491516  | 31.75049    | SCD           | EQB50834.1     |
| CGLO_10812                                                                         | 2.871037204  | 2.16E-57    | 531.6096193 | 72.578541   | T4HR1         | EQB49816.1     |
| CGLO_00442                                                                         | 2.877239309  | 9.23E-37    | 616.6463823 | 83.84044633 | THR1          | XP_007275196.1 |
| CGLO_10813                                                                         | 2.424821821  | 4.34E-48    | 11.48703533 | 2.057884667 | CMR1          | EQB49817.1     |
| CGLO_06458                                                                         | 1.075768152  | 4.69E-10    | 52.160119   | 24.69316167 | laccase genes | XP_007287641.1 |

|                                                                  |              |             |             |             |                     |                |
|------------------------------------------------------------------|--------------|-------------|-------------|-------------|---------------------|----------------|
| CGLO_02601                                                       | 1.462844269  | 9.19E-16    | 91.22101867 | 33.02918433 | laccase genes       | EQB57292.1     |
| CGLO_06095                                                       | 2.402810583  | 4.97E-17    | 15.76718267 | 2.900418    | laccase genes       | EQB54113.1     |
| CGLO_12977                                                       | 2.473574459  | 2.10E-31    | 99.16951767 | 17.772932   | laccase genes       | EQB47848.1     |
| CGLO_02394                                                       | 3.75466207   | 7.83E-59    | 32.25855633 | 2.297304667 | laccase genes       | EQB57469.1     |
| CGLO_04100                                                       | 1.906031748  | 2.07E-05    | 2.205543333 | 0.515177667 | laccase genes       | EQB55926.1     |
| <b>ethylene promoted the chitin deacetylases gene expression</b> |              |             |             |             |                     |                |
| CGLO_05235                                                       | -0.668802214 | 0.422105227 | 2.143086    | 3.465951667 | Chitin deacetylases | EQB54869.1     |
| CGLO_05233                                                       | -0.13878617  | 0.108898024 | 6.555568333 | 7.227637    | Chitin deacetylases | XP_007285779.1 |
| CGLO_07057                                                       | 1.272022303  | 6.61E-14    | 26.051288   | 10.72869733 | Chitin deacetylases | EQB53242.1     |
| CGLO_16772                                                       | 0.43098559   | 1.44E-06    | 17.77677767 | 13.160187   | Chitin deacetylases | XP_007284987.1 |
| CGLO_00212                                                       | 2.544167162  | 2.70E-16    | 5.590782    | 0.875666333 | Chitin deacetylases | EQB59400.1     |
| CGLO_16754                                                       | 2.69043504   | 5.09E-57    | 189.017222  | 29.19742367 | Chitin deacetylases | EQB44495.1     |
| CGLO_02140                                                       | 2.631594479  | 9.39E-27    | 30.05877267 | 4.766590333 | Chitin deacetylases | EQB57696.1     |

---
